# Supplementary material
Source: publisher figshare collection journal article supplement (https://future-science-group.figshare.com/articles/dataset/_/24081594)
Supplement: Supplementary file 1 [file 1]

Supplementary Table 1: Landmark analysis

| **Landmark analysis*** | **Total** | **Event** | **No event** | **Unadjusted HR, (95% CI)** |
| --- | --- | --- | --- | --- |
| 6 Months | 350 | 56 | 294 | 0.34 (0.23-0.50) |
| 12 Months | 280 | 75 | 205 | 0.24 (0.16-0.36) |
| 24 Months | 181 | 55 | 126 | 0.29 (0.17-0.50) |
| **Cox Time-Dependent Analysis** | 425 | 198 | 227 | 0.51 (0.38-0.69) |

CI, confidence interval; HR, hazard ratio

*Patients were excluded for each landmark if they did not have the minimum follow-up for that landmark or if they died before the landmark
