# Supplementary material
Source: publisher figshare collection journal article supplement (https://future-science-group.figshare.com/articles/dataset/_/24081594)

EFS v OS (N=425)

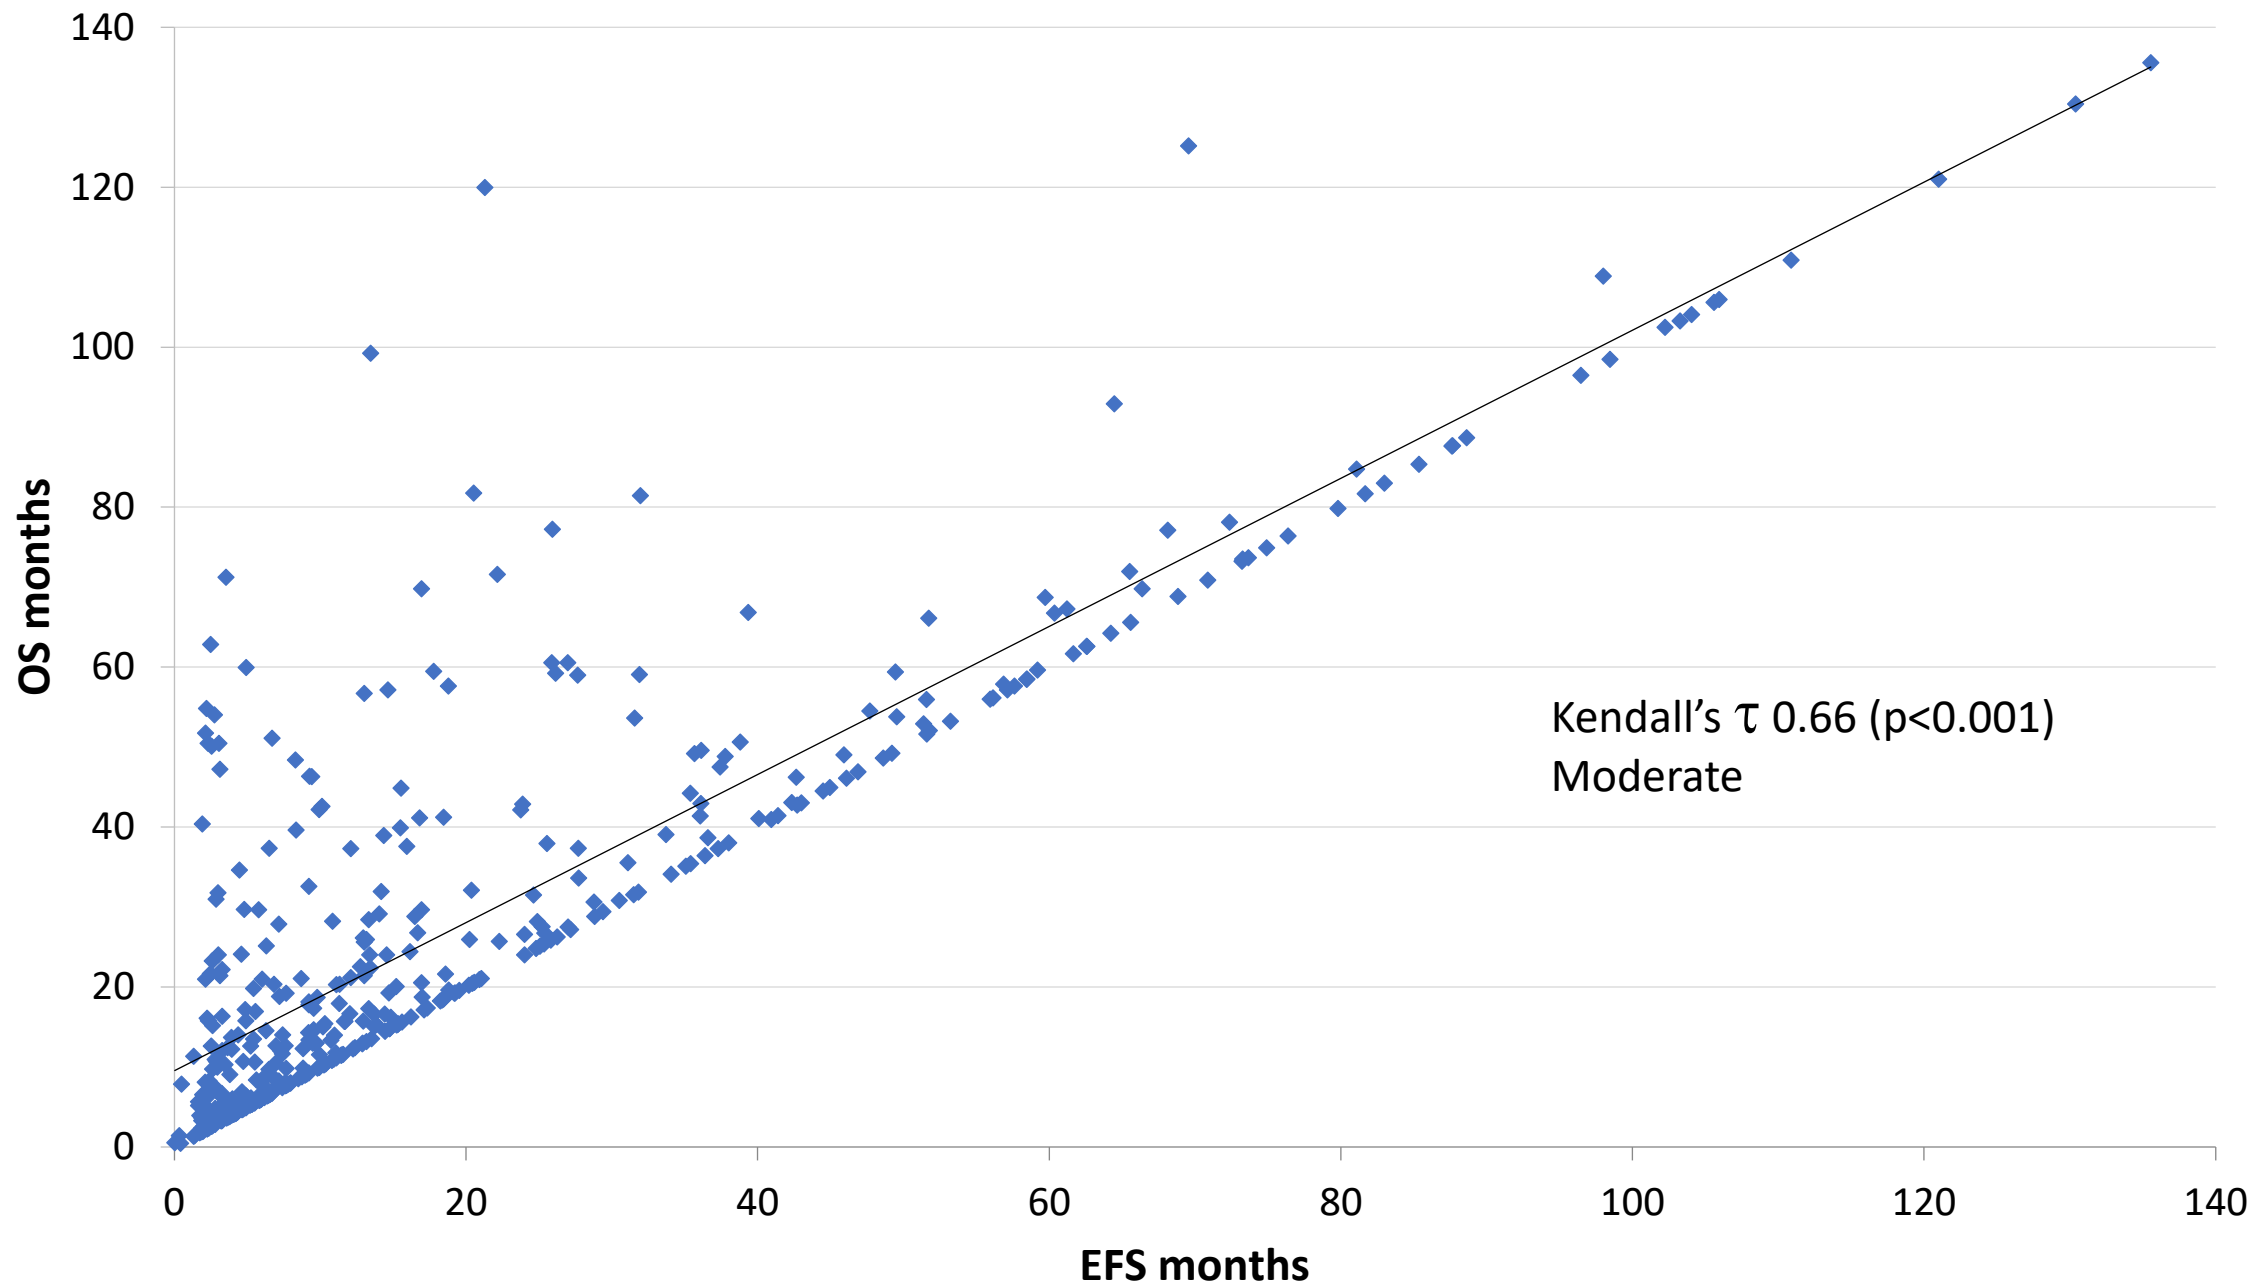

Supplement: Supplementary file 1 [file 1]
